# Supplementary material for: BaP6N10NH:Eu2+ as a Case Study–An Imidonitridophosphate Showing Luminescence
Source: PubMed Central journal article supplement — Chemistry. 2020 Mar 26;26(22):5010–6. doi: 10.1002/chem.201905082 (PMC7187282; doi:10.1002/chem.201905082), 2020-03-26
Supplement: CHEM-26-5010-s001.pdf [file CHEM-26-5010-s001.pdf]

# Chemistry–A European Journal

Supporting Information

## **BaP<sub>6</sub>N<sub>10</sub>NH:Eu<sup>2+</sup> as a Case Study–An Imidonitridophosphate Showing Luminescence**

Sebastian Wendl,<sup>[a]</sup> Lucien Eisenburger,<sup>[a, b]</sup> Mirjam Zipkat,<sup>[a]</sup> Daniel Günther,<sup>[b]</sup>  
Jonathan P. Wright,<sup>[d]</sup> Peter J. Schmidt,<sup>[c]</sup> Oliver Oeckler,<sup>[b]</sup> and Wolfgang Schnick\*<sup>[a]</sup>

## Author Contributions

S.W. Conceptualization: Lead; Formal analysis: Lead; Investigation: Lead; Validation: Lead; Visualization: Lead; Writing - Original Draft: Lead; Writing - Review & Editing: Lead

L.E. Formal analysis: Supporting; Investigation: Supporting; Validation: Supporting; Visualization: Supporting; Writing - Original Draft: Supporting; Writing - Review & Editing: Supporting

M.Z. Formal analysis: Supporting; Investigation: Supporting

D.G. Investigation: Supporting; Writing - Review & Editing: Supporting

J.W. Investigation: Supporting; Methodology: Supporting

P.S. Investigation: Supporting; Methodology: Supporting; Supervision: Supporting; Validation: Supporting; Writing - Review & Editing: Supporting

O.O. Conceptualization: Supporting; Formal analysis: Supporting; Funding acquisition: Supporting; Investigation: Supporting; Methodology: Supporting; Project administration: Supporting; Resources: Supporting; Supervision: Supporting; Validation: Supporting; Writing - Review & Editing: Supporting

W.S. Conceptualization: Lead; Funding acquisition: Lead; Project administration: Lead; Resources: Lead; Supervision: Lead; Validation: Equal; Writing - Review & Editing: Equal.

## Table of contents:

- SAED patterns of investigated crystal
- Position of the investigated crystallite on the finder grid
- FTIR spectrum of BaP<sub>6</sub>N<sub>10</sub>NH
- Additional crystallographic data of BaP<sub>6</sub>N<sub>10</sub>NH
- Details of the Rietveld refinement of BaP<sub>6</sub>N<sub>10</sub>NH
- EDX data
- CHNS data
- Interatomic distances and angles of BaP<sub>6</sub>N<sub>10</sub>NH
- Temperature-dependent X-ray diffraction data
- Diffuse reflectance spectrum
- Weighed portions

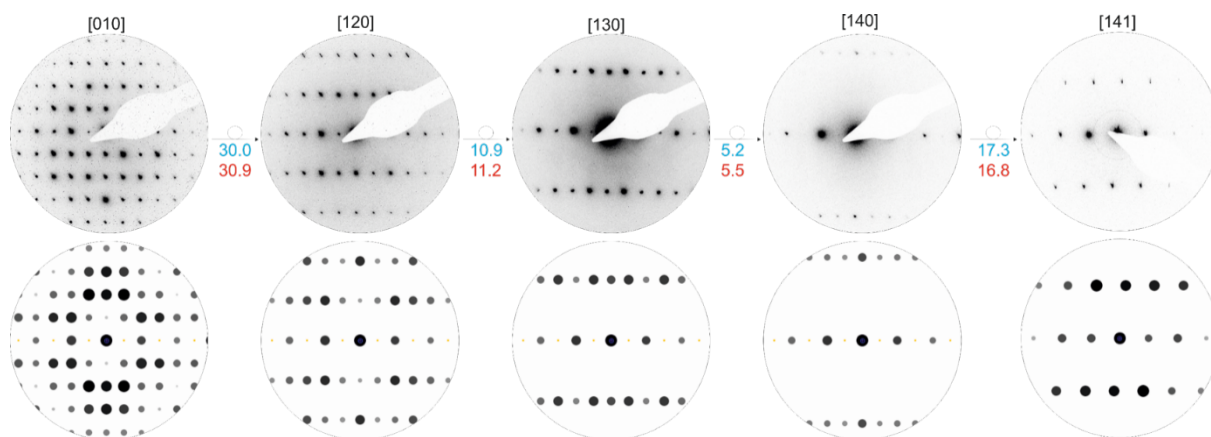

**Figure S1.** Measured (top) and simulated (bottom) selected area electron diffraction (SAED) patterns of the investigated crystallite.

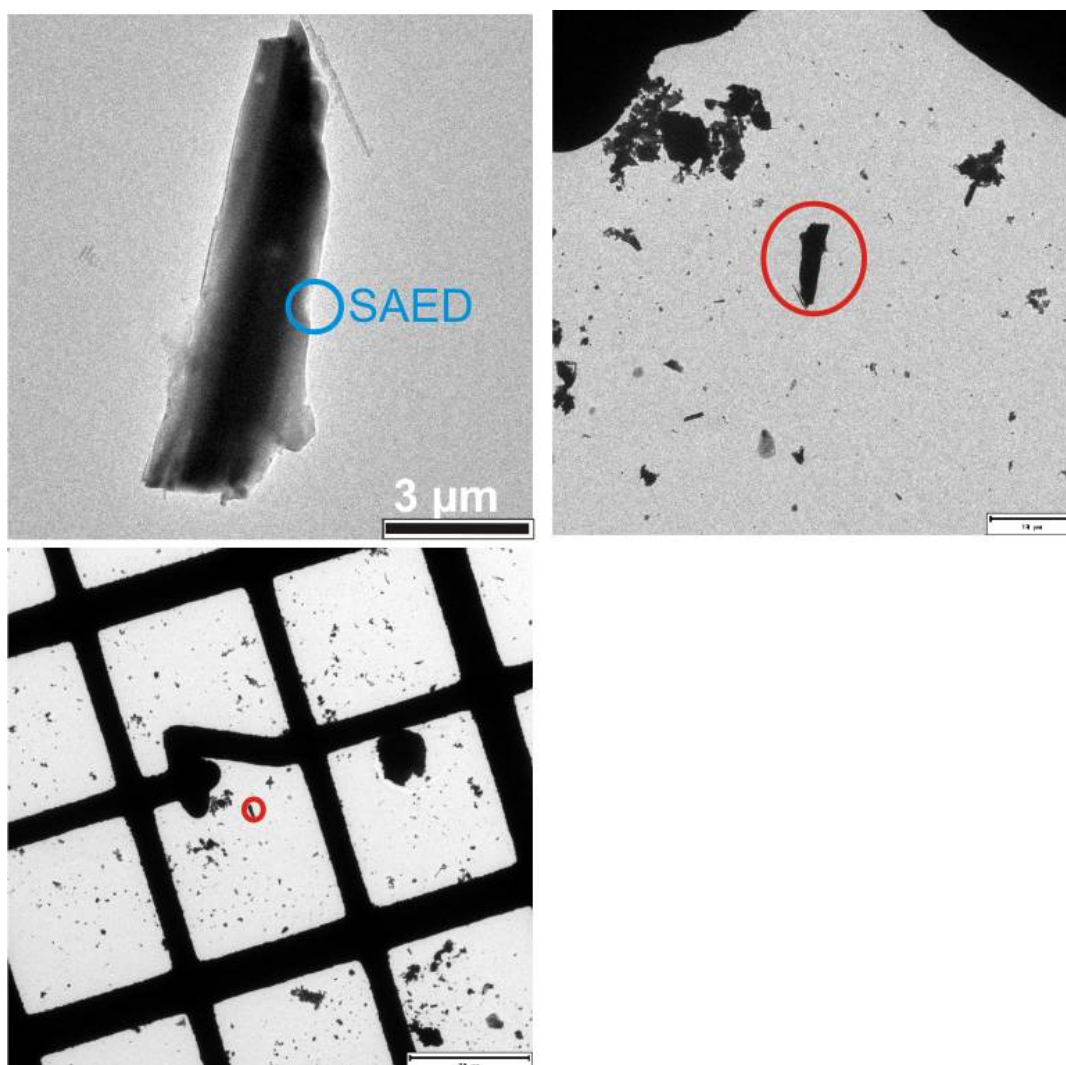

**Figure S2.** Position of the investigated crystallite on the finder grid.

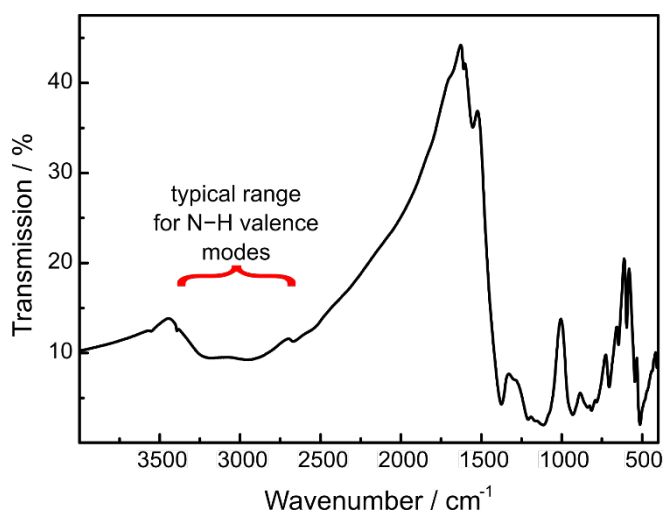

**Figure S3.** FTIR spectrum of BaP<sub>6</sub>N<sub>10</sub>NH, measured using the KBr pellet method. A significant vibration attributed to the N–H valence mode can be seen between 2700 and 3400 cm<sup>-1</sup>.

**Table S1.** Crystallographic data of the single-crystal refinement of BaP<sub>6</sub>N<sub>10</sub>NH.<sup>[a]</sup>

| Formula                                                                | BaP <sub>6</sub> N <sub>10</sub> NH          |
|------------------------------------------------------------------------|----------------------------------------------|
| Formula weight / g·mol <sup>-1</sup>                                   | 478.28                                       |
| Crystal system; space group                                            | hexagonal; <i>P</i> 6 <sub>3</sub> (no. 173) |
| Lattice parameters / Å <sup>[a,b]</sup>                                | <i>a</i> = 7.5585(1)<br><i>c</i> = 8.5106(1) |
| Cell volume / Å <sup>3[a]</sup>                                        | 421.08(1)                                    |
| Formula units per unit cell                                            | 2                                            |
| Density / g·cm <sup>-3</sup>                                           | 3.764                                        |
| $\mu$ / mm <sup>-1</sup>                                               | 2.808                                        |
| Diffractometer                                                         | ESRF beamline ID11                           |
| Radiation                                                              | synchrotron, $\lambda$ = 0.30996 Å           |
| $2\theta$ -range / °                                                   | 1.712 ≤ $\theta$ ≤ 14.966                    |
| Total number of reflections                                            | 3929                                         |
| No. of independent reflections                                         | 1264                                         |
| Observed reflections ( $F^2 > 2\sigma(F^2)$ )                          | 1246                                         |
| $R_{\text{int}}, R_{\sigma}$                                           | 0.032; 0.056                                 |
| Refined parameters                                                     | 56                                           |
| Goodness of fit ( $\chi^2$ )                                           | 0.927                                        |
| $R1$ (all data); $R1$ ( $F^2 > 2\sigma(F^2)$ )                         | 0.023; 0.023                                 |
| $wR2$ (all data); $wR2$ ( $F^2 > 2\sigma(F^2)$ )                       | 0.056; 0.056                                 |
| $\Delta\rho_{\text{max}}; \Delta\rho_{\text{min}}$ / e·Å <sup>-3</sup> | 1.526; -0.869                                |

[a] Estimated standard deviations are given in parentheses.

[b] The lattice parameters were used as determined from powder data (Table S4).

**Table S2.** Atomic coordinates, crystallographic positions, and equivalent isotropic displacement parameters ( $\text{\AA}^2$ ) of  $\text{BaP}_6\text{N}_{10}\text{NH}$ .

| Atom | Wyckoff | x           | y           | z          | $U_{\text{eq}}$ [ $\text{\AA}$ ] |
|------|---------|-------------|-------------|------------|----------------------------------|
| Ba1  | 2b      | 1/3         | 2/3         | 0.32488(5) | 0.01877(10)                      |
| P1   | 6c      | 0.15059(10) | 0.26065(9)  | 0.02807(7) | 0.00817(12)                      |
| P2   | 6c      | 0.40609(9)  | 0.17513(10) | 0.20595(6) | 0.00695(12)                      |
| N1   | 6c      | 0.2929(3)   | 0.3026(3)   | 0.1813(2)  | 0.0092(3)                        |
| N2   | 6c      | 0.3467(3)   | 0.0088(3)   | 0.0655(2)  | 0.0091(3)                        |
| N3   | 6c      | 0.3734(3)   | 0.0801(3)   | 0.3791(2)  | 0.0095(3)                        |
| N4   | 2b      | 1/3         | 2/3         | 0.6784(5)  | 0.0078(5)                        |
| N5   | 2a      | 0           | 0           | 0.0000(4)  | 0.0093(5)                        |

[a] Estimated standard deviations are given in parentheses.

**Table S3.** Anisotropic displacement parameters of  $\text{BaP}_6\text{N}_{10}\text{NH}$  ( $\text{\AA}^2$ ).

| Atom | $U_{11}$    | $U_{22}$    | $U_{33}$    | $U_{12}$   | $U_{13}$   | $U_{23}$   |
|------|-------------|-------------|-------------|------------|------------|------------|
| Ba1  | 0.01962(11) | 0.01962(11) | 0.01706(12) | 0.00981(6) | 0.00000    | 0.00000    |
| P1   | 0.0084(2)   | 0.0081(2)   | 0.0079(2)   | 0.0040(2)  | -0.0009(2) | -0.0000(2) |
| P2   | 0.0067(2)   | 0.0073(2)   | 0.0068(2)   | 0.0034(2)  | -0.0002(2) | 0.0001(2)  |
| N1   | 0.0099(7)   | 0.0104(7)   | 0.0085(5)   | 0.0060(6)  | -0.0017(6) | -0.0009(5) |
| N2   | 0.0072(7)   | 0.0099(7)   | 0.0086(5)   | 0.0030(6)  | -0.0005(5) | -0.0026(6) |
| N3   | 0.0120(7)   | 0.0118(7)   | 0.0069(6)   | 0.0076(6)  | 0.0028(6)  | 0.0021(6)  |
| N4   | 0.0065(7)   | 0.0065(7)   | 0.0106(11)  | 0.0032(4)  | 0.00000    | 0.00000    |
| N5   | 0.0076(7)   | 0.0076(7)   | 0.0129(12)  | 0.0038(3)  | 0.00000    | 0.00000    |

[a] Estimated standard deviations are given in parentheses.

**Table S4.** Crystallographic data of the Rietveld refinement of BaP<sub>6</sub>N<sub>10</sub>NH.<sup>[a]</sup>

|                                             |                                              |
|---------------------------------------------|----------------------------------------------|
| Formula                                     | BaP <sub>6</sub> N <sub>10</sub> NH          |
| Formula weight / g·mol <sup>-1</sup>        | 478.28                                       |
| Crystal system; space group                 | hexagonal; P6 <sub>3</sub> (no. 173)         |
| Lattice parameters / Å <sup>[a]</sup>       | <i>a</i> = 7.5585(1)<br><i>c</i> = 8.5106(1) |
| Cell volume / Å <sup>3</sup> <sup>[a]</sup> | 421.07(1)                                    |
| Formula units per unit cell                 | 2                                            |
| Density / g·cm <sup>-3</sup>                | 3.764                                        |
| $\mu$ / mm <sup>-1</sup>                    | 4.999                                        |
| Diffractometer                              | Stoe Stadi P                                 |
| Radiation                                   | MoK $\alpha$ ( $\lambda$ = 0.71073 Å)        |
| Detector                                    | Mythen 1K                                    |
| Monochromator                               | Ge(111)                                      |
| 2 $\theta$ -range / °                       | 3.0 $\leq$ 2 $\theta$ $\leq$ 56.3            |
| Step width / °                              | 0.015                                        |
| Data points                                 | 3552                                         |
| Total number of reflections                 | 281                                          |
| Refined parameters                          | 47                                           |
| Background function                         | Shifted Chebyshev                            |
| Number of background parameters             | 14                                           |
| Goodness of fit ( $\chi^2$ )                | 1.979                                        |
| $R_p$ ; $R_{wp}$                            | 0.038; 0.051                                 |
| $R_{exp}$ ; $R_{Bragg}$                     | 0.026; 0.015                                 |

[a] Estimated standard deviations are given in parentheses.

**Table S5.** EDX measurements of BaP<sub>6</sub>N<sub>10</sub>NH.

| EDX point / atom % | Ba  | P    | N    | O   |
|--------------------|-----|------|------|-----|
| 1                  | 5.9 | 35.9 | 58.2 | -   |
| 2                  | 6.4 | 36.3 | 57.3 | -   |
| 3                  | 4.7 | 28.8 | 64.5 | 2.0 |
| 4                  | 6.7 | 38.0 | 53.6 | 1.7 |
| 5                  | 4.5 | 25.8 | 66.3 | 3.4 |
| 6                  | 6.5 | 28.3 | 62.9 | 2.3 |
| 7                  | 5.6 | 33.5 | 60.9 | -   |
| 8                  | 6.0 | 34.0 | 60.0 | -   |
| 9                  | 5.0 | 33.1 | 59.1 | 2.8 |
| 10                 | 6.2 | 35.9 | 57.9 | -   |
| Measured atom %    | 5.7 | 33.0 | 60.1 | 1.2 |
| Calculated atom %  | 5.6 | 33.3 | 61.1 | -   |

**Table S6.** CHNS analysis of BaP<sub>6</sub>N<sub>10</sub>NH.

| Element             | C | H    | N     | S |
|---------------------|---|------|-------|---|
| Measured weight %   | - | 0.37 | 32.07 | - |
| Calculated weight % | - | 0.20 | 32.22 | - |

**Table S7.** Interatomic distances (Å) and bond angles (°) in the structure of BaP<sub>6</sub>N<sub>10</sub>NH.

|      |    |          |    |      |    |          |
|------|----|----------|----|------|----|----------|
| Ba1- | N1 | 2.884(3) | N3 | -P1- | N2 | 112.9(1) |
| Ba1- | N1 | 2.884(2) | N3 | -P1- | N1 | 109.2(1) |
| Ba1- | N1 | 2.884(2) | N3 | -P1- | N5 | 112.4(1) |
| Ba1- | N4 | 3.009(4) | N2 | -P1- | N1 | 108.3(1) |
| Ba1- | N3 | 3.021(2) | N2 | -P1- | N5 | 104.7(1) |
| Ba1- | N3 | 3.021(2) | N1 | -P1- | N5 | 109.2(1) |
| Ba1- | N3 | 3.021(3) | N1 | -P2- | N3 | 112.6(1) |
| Ba1- | N2 | 3.182(2) | N1 | -P2- | N2 | 110.3(1) |
| Ba1- | N2 | 3.182(2) | N1 | -P2- | N4 | 109.5(1) |
| Ba1- | N2 | 3.182(2) | N3 | -P2- | N2 | 114.1(1) |
| Ba1- | N2 | 3.363(2) | N3 | -P2- | N4 | 107.5(1) |
| Ba1- | N2 | 3.363(2) | N2 | -P2- | N4 | 102.3(1) |
| Ba1- | N2 | 3.363(2) | P2 | -N1- | P1 | 119.6(1) |
| P1-  | N3 | 1.606(2) | P1 | -N2- | P2 | 119.8(1) |
| P1-  | N2 | 1.612(3) | P2 | -N3- | P1 | 129.5(1) |
| P1-  | N1 | 1.618(2) | P2 | -N4- | P2 | 118.2(1) |
| P1-  | N5 | 1.730(1) | P1 | -N5- | P1 | 118.1(1) |
| P2-  | N1 | 1.590(3) |    |      |    |          |
| P2-  | N3 | 1.603(2) |    |      |    |          |
| P2-  | N2 | 1.627(2) |    |      |    |          |
| P2-  | N4 | 1.735(1) |    |      |    |          |

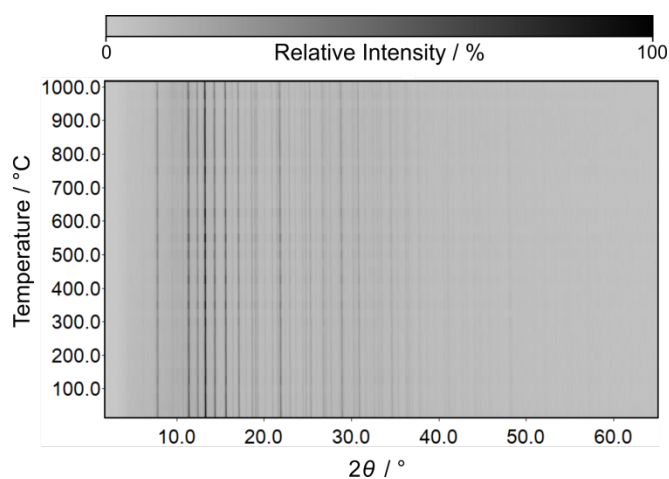**Figure S4.** Temperature-dependent powder X-ray diffraction pattern (Mo-K $\alpha$  radiation,  $\lambda = 0.71073$  Å) of BaP<sub>6</sub>N<sub>10</sub>NH measured under Ar atmosphere showing a liminal thermal expansion with increasing temperature.



**Table S8.** Determined values for  $a$ ,  $c$ , and  $V$  from Rietveld refinements of  $\text{BaP}_6\text{N}_{10}\text{NH}$  at selected temperatures.

| Temperature / °C | $a$ / Å   | $c$ / Å   | $V$ / Å <sup>3</sup> |
|------------------|-----------|-----------|----------------------|
| 25               | 7.5821(3) | 8.5378(4) | 425.06(4)            |
| 250              | 7.5930(3) | 8.5453(5) | 426.66(4)            |
| 500              | 7.6062(3) | 8.5576(5) | 428.77(4)            |
| 750              | 7.6221(3) | 8.5719(5) | 431.27(4)            |
| 1000             | 7.6398(6) | 8.5909(7) | 434.24(7)            |

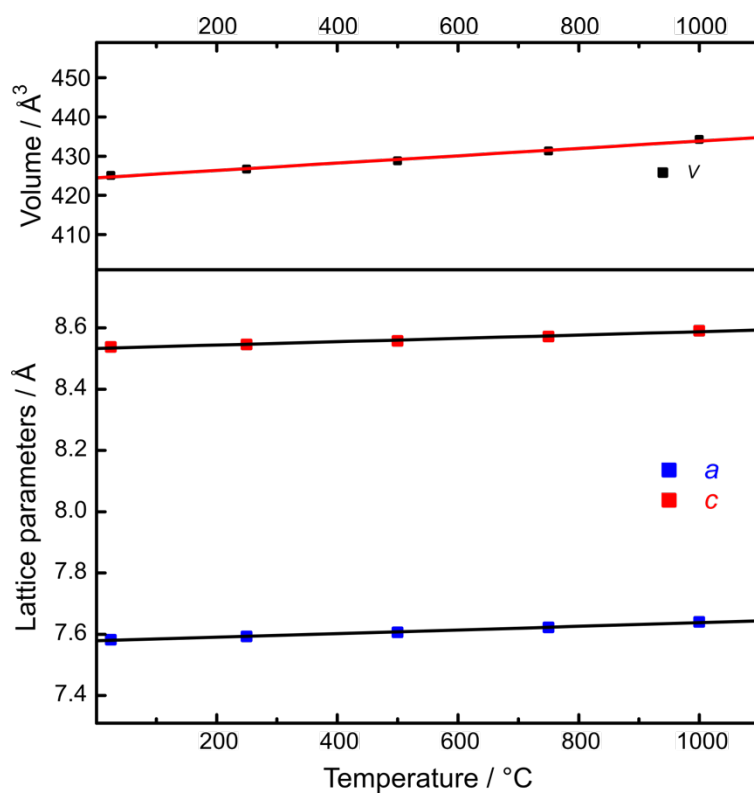

**Figure S5.** Temperature-dependent evolution of lattice parameters and volume of  $\text{BaP}_6\text{N}_{10}\text{NH}$ .

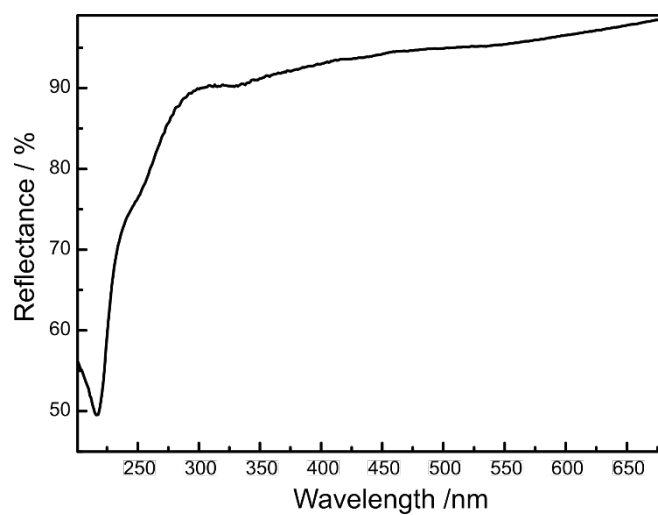

**Figure S6.** Diffuse reflectance spectrum of BaP<sub>6</sub>N<sub>10</sub>NH.

**Table S9.** Weighed portions of the starting materials used for the synthesis of BaP<sub>6</sub>N<sub>10</sub>NH.

| Compound                            | Starting material                | Amount   |
|-------------------------------------|----------------------------------|----------|
| BaP <sub>6</sub> N <sub>10</sub> NH | P <sub>3</sub> N <sub>5</sub>    | 23.85 mg |
|                                     | NH <sub>4</sub> Cl               | 3.91 mg  |
|                                     | Ba(N <sub>3</sub> ) <sub>2</sub> | 21.87 mg |
